# Supplementary material for: Postpartum depression, childbirth-related PTSD and maternal bonding: The role of social support in a psychosocial rerspective
Source: Research Square preprint supplement (doi:10.21203/rs.3.rs-6620032/v1), 2025-08-06
Supplement: Supplementary file 1 [file 8774d5784336080d5275061c.docx]

**Postpartum depression, childbirth-related PTSD and maternal bonding: The role of social support in a psychosocial rerspective**

**Renáta Kovács-Berta, Lilla Sándor, Fanni Dudok, Norbert Pásztor, Edina Dombi**

**Statements and Declarations**

**Conflict of interest**

All authors certify that they have no affiliations with or involvement in any organization or entity with any financial interest or non-financial interest in the subject matter of materials discussed in this manuscript.

Tha authors did not receive support from any organization for the submitted work.

**The authors declare they have no financial interests.**

The publication of this paper is the full contribution of the authors.

The publication of this work was supported by University of Szeged, Grand numbers: **7742**.

**Data accessibility statement**

The datasets used and analyzed during the current study are available from the corresponding author on reasonable request.

**Data** **Availability**

"Data analysis in the text, these will be made aviable after consultation with the corresponting author.

**Ethics approval statement**

The University of Szeged approved study protocols of all data collections and data analysis approaches reported in this study (133/2021-SZTE-RKEB). The procedures used in this study adhere to the tenets of the Declaration of Helsinki.

**Informed consent**

Prior to the study, informed consent was obtained full all adult participants involved in the research.
